# Supplementary material for: Modeling of Body Weight Metrics for Effective and Cost-Efficient Conventional Factor VIII Dosing in Hemophilia A Prophylaxis
Source: MDPI journal article supplement (doi:10.3390/pharmaceutics9040047), 2017-10-17
Supplement: s1 [file s1]

# Supplementary Materials: Modeling of Body Weight Metrics for Effective and Cost-Efficient Conventional Factor VIII Dosing in Hemophilia A Prophylaxis

Alanna McEneny-King <sup>1</sup>, Pierre Chelle <sup>1</sup>, Severine Henrard <sup>2</sup>, Cedric Hermans <sup>3</sup>, Alfonso Iorio <sup>4,5</sup> and Andrea N. Edginton <sup>1,\*</sup>

<sup>1</sup> School of Pharmacy, University of Waterloo, Waterloo, Ontario, Canada

<sup>2</sup> Louvain Drug Research Institute, Clinical Pharmacy Research Group and Institute of Health and Society (IRSS), Université catholique de Louvain, Brussels, Belgium

<sup>3</sup> Haemostasis and Thrombosis Unit, Division of Haematology, Cliniques universitaires Saint-Luc, Université catholique de Louvain, Brussels, Belgium

<sup>4</sup> Department of Health Evidence, Research Methods and Impact, McMaster University, Hamilton, Ontario, Canada

<sup>5</sup> Department of Medicine, McMaster University, Canada

\* Correspondence: aedginto@uwaterloo.ca; Tel.: 519-888-4567 (ext. 21315)

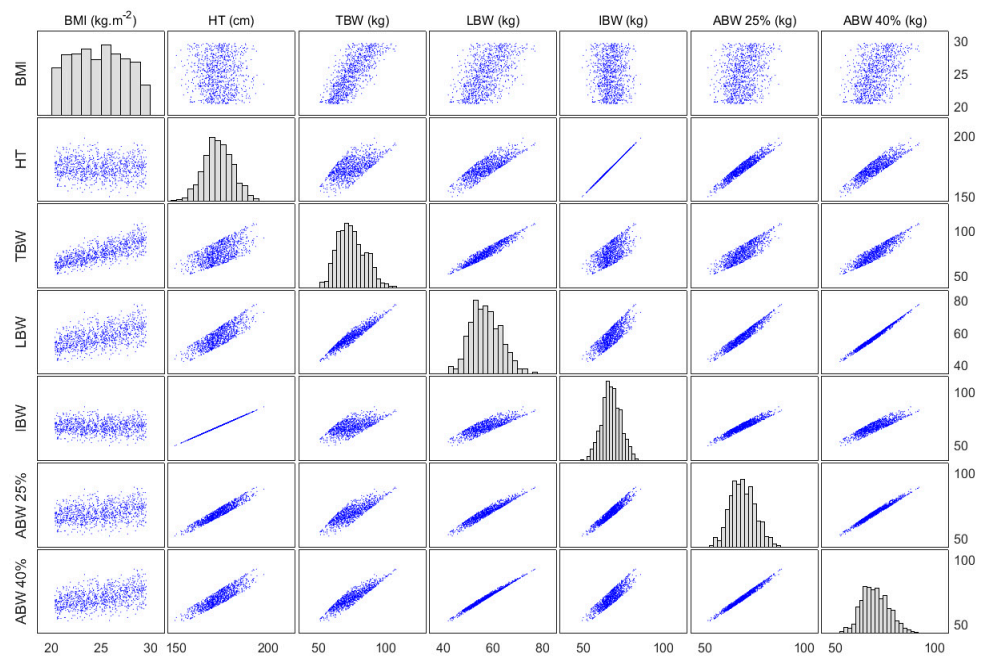

**Figure S1.** Correlation plots for all body size metrics used in simulations for the normal BMI subgroup. Diagonal elements contain histograms.

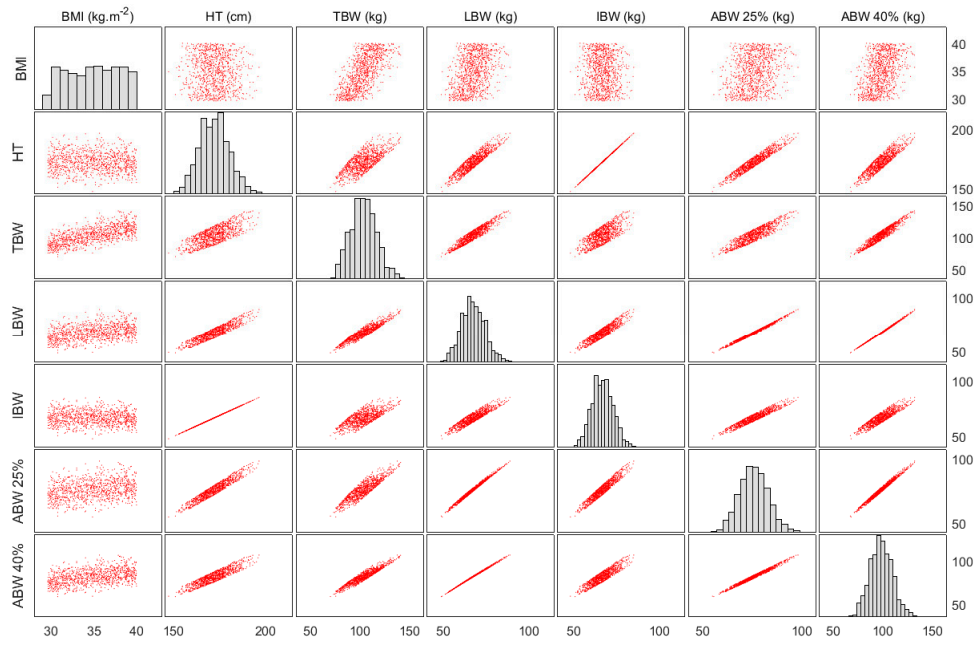

**Figure S2.** Correlation plots for all body size metrics used in simulations for the overweight/obese subgroup. Diagonal elements contain histograms.
